# Supplementary material for: A computational study of the protonation of simple amines in water clusters
Source: Royal Society of Chemistry journal article supplement (doi:10.1039/c3cp51668g), 2013-01-01
Supplement: c3cp51668g.pdf [file c3cp51668g.pdf]

### Supporting information

**Table 1:** Deformation and coordination energies (kJ/mol) of ammonia-water clusters at the MP2/6-311+G(2d,2p) computational level.

| <i>n</i> |                      | $E_{def}$ | $\Delta E_{coord}$ |
|----------|----------------------|-----------|--------------------|
| <b>1</b> | <b>1-I</b>           | 0.46      | -24.93             |
| <b>2</b> | <b>1-II</b>          | 2.01      | -59.98             |
| <b>3</b> | <b>1-III-cyc-ext</b> | 2.67      | -86.69             |
| <b>3</b> | <b>1-III-cyc</b>     | 4.67      | -98.97             |
| <b>4</b> | <b>1-IV-cyc-ext</b>  | 5.74      | -130.5             |
| <b>4</b> | <b>1-IV-cyc</b>      | 6.72      | -131.5             |
| <b>4</b> | <b>1-IV-prot</b>     | 757.23    | -60.89             |
| <b>5</b> | <b>1-V-cyc-ext</b>   | 7.51      | -161.66            |
| <b>5</b> | <b>1-V-cyc</b>       | 8.26      | -158.66            |
| <b>5</b> | <b>1-V-prot</b>      | 699.66    | -102.59            |
| <b>6</b> | <b>1-VI-cyc</b>      | 10.23     | -114.23            |
| <b>6</b> | <b>1-VI-cyc-ext</b>  | 25.52     | -134.24            |
| <b>6</b> | <b>1-VI-prot</b>     | 1356.68   | -42.29             |
| <b>7</b> | <b>1-VII-cyc-ext</b> | 28.49     | -158.8             |
| <b>7</b> | <b>1-VII-prot</b>    | 1460.63   | -86.1613           |

**Table 2:** Deformation and coordination energies (kJ/mol) of methylamine-water clusters at the MP2/6-311+G(2d,2p) computational level.

| <i>n</i> |               | <i>E<sub>def</sub></i> | $\Delta E_{\text{coord}}$ |
|----------|---------------|------------------------|---------------------------|
| 1        | 2-I           | 0.85                   | -27.87                    |
| 2        | 2-II          | 2.86                   | -62.54                    |
| 3        | 2-III-cyc-ext | 5.96                   | -99.36                    |
| 3        | 2-III-cyc     | 6.16                   | -101.97                   |
| 4        | 2-IV-cyc-ext  | 6.43                   | -133.56                   |
| 4        | 2-IV-cyc      | 8.70                   | -134.31                   |
| 4        | 2-IV-prot     | 767.47                 | -79.05                    |
| 4        | 2-IV-prot-met | 648.26                 | -60.96                    |
| 5        | 2-V-cyc-ext   | 8.69                   | -165.50                   |
| 5        | 2-V-cyc       | 10.15                  | -161.35                   |
| 5        | 2-V-prot      | 1180.10                | -114.21                   |
| 5        | 2-V-prot-met1 | 972.60                 | -74.02                    |
| 5        | 2-V-prot-met2 | 582.63                 | -111.00                   |
| 6        | 2-VI-cyc      | ...                    | ...                       |
| 6        | 2-VI-cyc-ext  | ...                    | ...                       |
| 6        | 2-VI-prot     | 1364.61                | -61.82                    |
| 6        | 2-VI-prot-met | 790.97                 | -41.47                    |
| 7        | 2-VII-cyc-ext | ...                    | ...                       |
| 7        | 2-VII-prot    | 1471.72                | -105.80                   |

**Table 3:** Deformation and coordination energies (kJ/mol) of dimethylamine-water clusters at the MP2/6-311+G(2d,2p) computational level.

| <i>n</i> |                       | $E_{def}$ | $\Delta E_{coord}$ |
|----------|-----------------------|-----------|--------------------|
| 1        | <b>3-I</b>            | 0.97      | -29.35             |
| 2        | <b>3-II</b>           | 3.24      | -63.64             |
| 3        | <b>3-III-cyc-ext</b>  | 4.21      | -106.35            |
| 3        | <b>3-III-cyc</b>      | 7.04      | -90.84             |
| 3        | <b>3-III-cyc-met</b>  | 5.92      | -95.47             |
| 4        | <b>3-IV-cyc-ext</b>   | 6.98      | -134.86            |
| 4        | <b>3-IV-cyc</b>       | 9.62      | -136.56            |
| 4        | <b>3-IV-cyc-met</b>   | 7.49      | -124.86            |
| 4        | <b>3-IV-prot-met</b>  | 663.73    | -85.44             |
| 5        | <b>3-V-cyc-ext</b>    | 9.18      | -167.92            |
| 5        | <b>3-V-cyc</b>        | 12.66     | -164.52            |
| 5        | <b>3-V-prot-met1</b>  | 981.91    | -96.59             |
| 5        | <b>3-V-prot-met2</b>  | 596.29    | -132.66            |
| 6        | <b>3-VI-cyc</b>       | ...       | ...                |
| 6        | <b>3-VI-cyc-ext</b>   | ...       | ...                |
| 6        | <b>3-VI-Prot-met</b>  | 1508.60   | -50.73             |
| 7        | <b>3-VII-cyc-ext</b>  | ...       | ...                |
| 7        | <b>3-VII-prot-met</b> | 782.07    | -77.19             |

**Table 4:** Deformation and coordination energies (kJ/mol) of trimethylamine-water clusters at the MP2/6-311+G(2d,2p) computational level.

| <i>n</i> |                      | <i>E<sub>def</sub></i> | $\Delta E_{\text{coord}}$ |
|----------|----------------------|------------------------|---------------------------|
| <b>1</b> | <b>4-I</b>           | 1.15                   | -29.16                    |
| <b>2</b> | <b>4-II-cyc-ext</b>  | 3.85                   | -63.13                    |
| <b>3</b> | <b>4-III-cyc-ext</b> | 5.03                   | -93.65                    |
| <b>3</b> | <b>4-III-cyc-met</b> | 6.56                   | -96.04                    |
| <b>4</b> | <b>4-IV-cyc-ext</b>  | 7.60                   | -136.77                   |
| <b>4</b> | <b>4-IV-cyc-met</b>  | 8.11                   | -125.59                   |
| <b>5</b> | <b>4-V-cyc-ext</b>   | 9.39                   | -168.84                   |
| <b>6</b> | <b>4-VI-cyc-ext</b>  | ...                    | ...                       |
| <b>7</b> | <b>4-VII-cyc-ext</b> | ...                    | ...                       |

**Table 5:** Vibration modes ( $\text{cm}^{-1}$ ) associated with the stretching frequency of the closest O-H bond to the amino group obtained at the MP2/6-311+G(2d,2p) computational level.

| <i>n</i>              | <i>Cyc</i> | <i>Cyc-ext</i> |
|-----------------------|------------|----------------|
| <b>Ammonia</b>        |            |                |
| 1                     | 3612       | ...            |
| 2                     | 3434       | ...            |
| 3                     | 3261       | 3549           |
| 4                     | 3197       | 3545           |
| 5                     | 3165       | 3559           |
| 6                     | 3598       | 3553           |
| 7                     | ...        | 3547           |
| <b>Methylamine</b>    |            |                |
| 1                     | 3543       | ...            |
| 2                     | 3333       | ...            |
| 3                     | 3128       | 3134           |
| 4                     | 3042       | 3279           |
| 5                     | 3012       | 3458           |
| 6                     | ...        | ...            |
| 7                     | ...        | ...            |
| <b>Dimethylamine</b>  |            |                |
| 1                     | 3486       | ...            |
| 2                     | 3255       | ...            |
| 3                     | 3042       | 3302           |
| 4                     | 2926       | 3386           |
| 5                     | 2866       | 3380           |
| 6                     | ...        | ...            |
| 7                     | ...        | ...            |
| <b>Trimethylamine</b> |            |                |
| 1                     | 3443       | ...            |
| 2                     | 3168       | ...            |
| 3                     | 3459       | 3199           |
| 4                     | 3030       | 3328           |
| 5                     | ...        | 3334           |
| 6                     | ...        | ...            |
| 7                     | ...        | ...            |

**Table 6:** Vibration modes ( $\text{cm}^{-1}$ ) associated with the stretching frequency of the longest N-H bond obtained at the MP2/6-311+G(2d,2p) computational level.

| <i>n</i>             | <i>Cyc</i> | <i>Prot (sym)</i> | <i>Prot (asym)</i> |
|----------------------|------------|-------------------|--------------------|
| <b>Ammonia</b>       |            |                   |                    |
| 1                    | 3634       | ...               | ...                |
| 2                    | 3601       | ...               | ...                |
| 3                    | 3582       | ...               | ...                |
| 4                    | 3421       | 3045              | 3054/3055          |
| 5                    | 3409       | ...               | 2912               |
| 6                    | 3473       | ...               | 2911               |
| 7                    | ...        | 2992              | 2970/2970          |
| <b>Methylamine</b>   |            |                   |                    |
| 1                    | 3543       | ...               | ...                |
| 2                    | 3494       | ...               | ...                |
| 3                    | 3465       | ...               | ...                |
| 4                    | 3440       | 2573              | 2768/2798          |
| 5                    | 3421       | ...               | 2963               |
| 6                    | ...        | ...               | 2947               |
| 7                    | ...        | 3041              | 3029/3029          |
| <b>Dimethylamine</b> |            |                   |                    |
| 1                    | 3545       | ...               | ...                |
| 2                    | 3498       | ...               | ...                |
| 3                    | 3466       | ...               | ...                |
| 4                    | 3438       | 2862              | 2846               |
| 5                    | 3430       | ...               | 2752/2804          |
| 6                    | ...        | ...               | 2978               |
| 7                    | ...        | ...               | 2399               |
